# Supplementary material
Source: PubMed Central journal article supplement (PMC4001732)

**A**

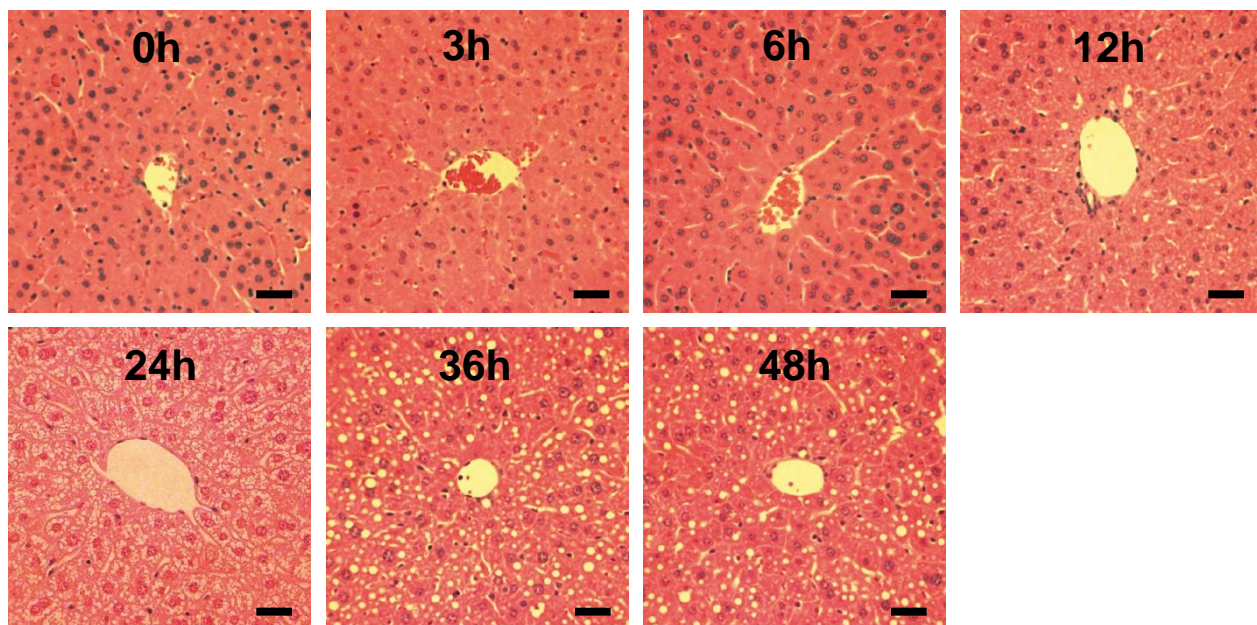

**B**

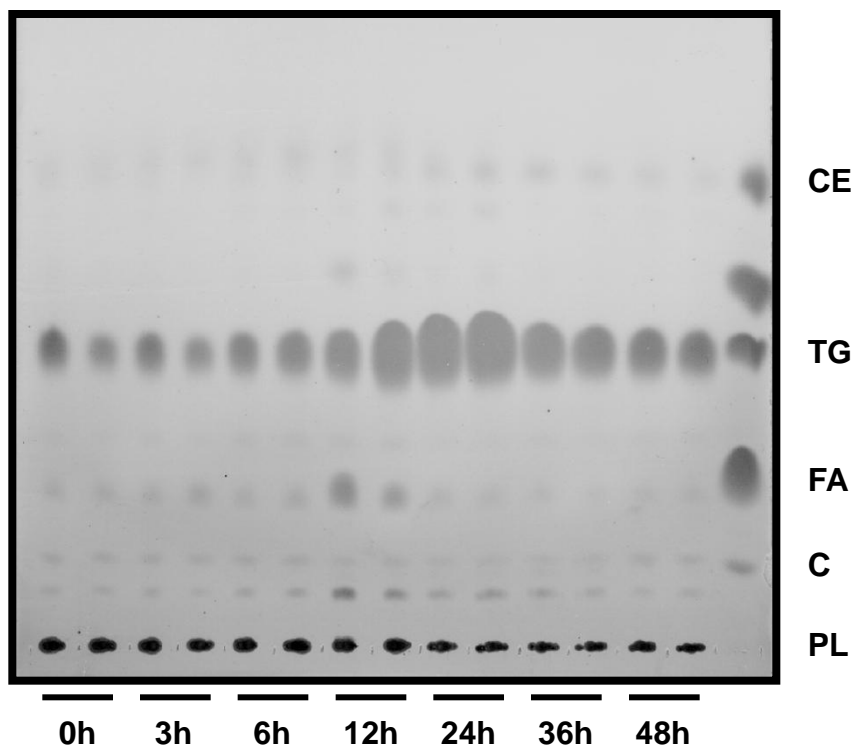

**C**

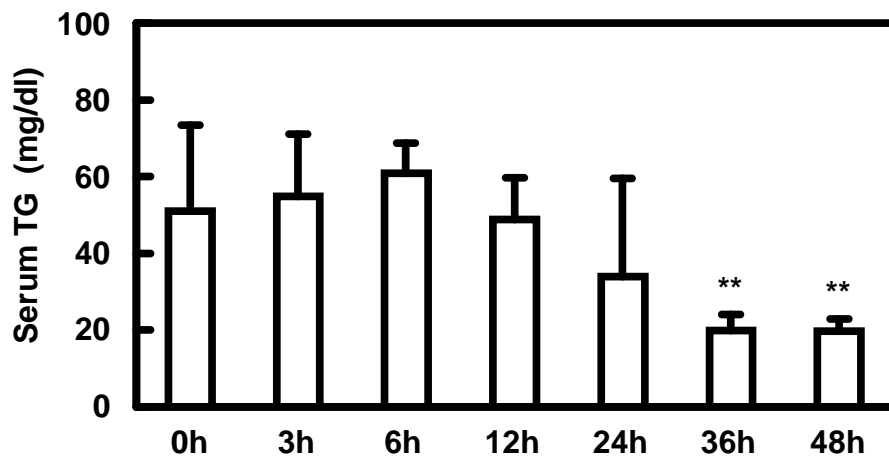

**D**

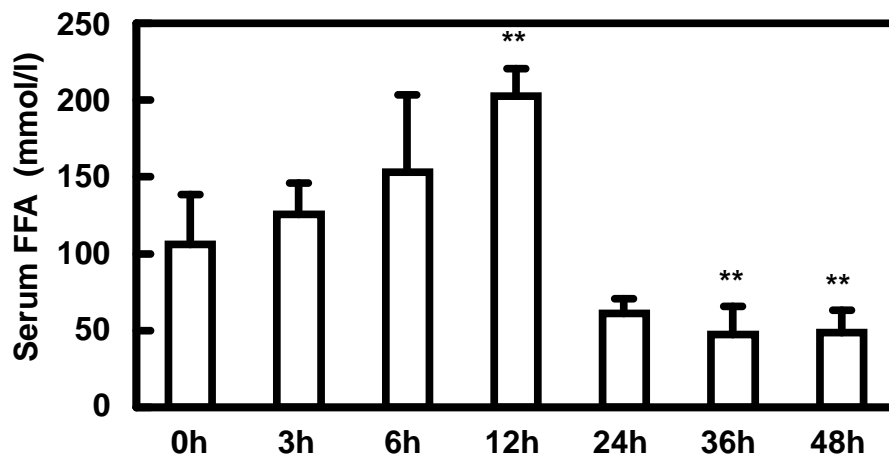

**E**

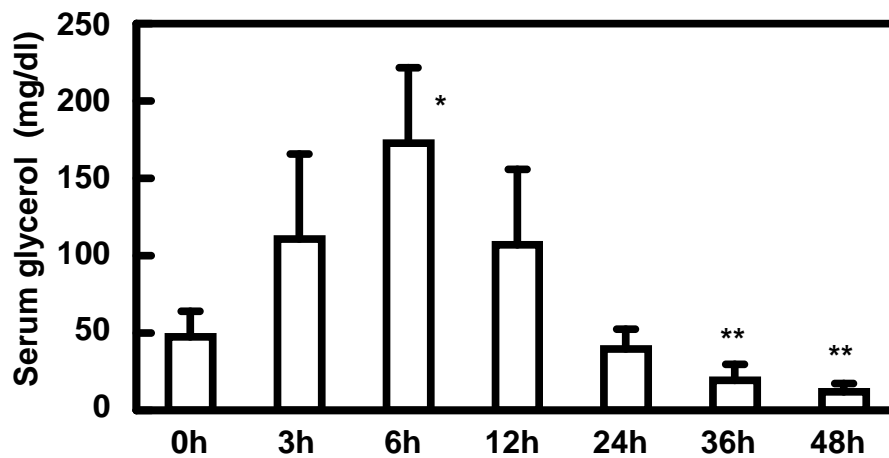

**A**

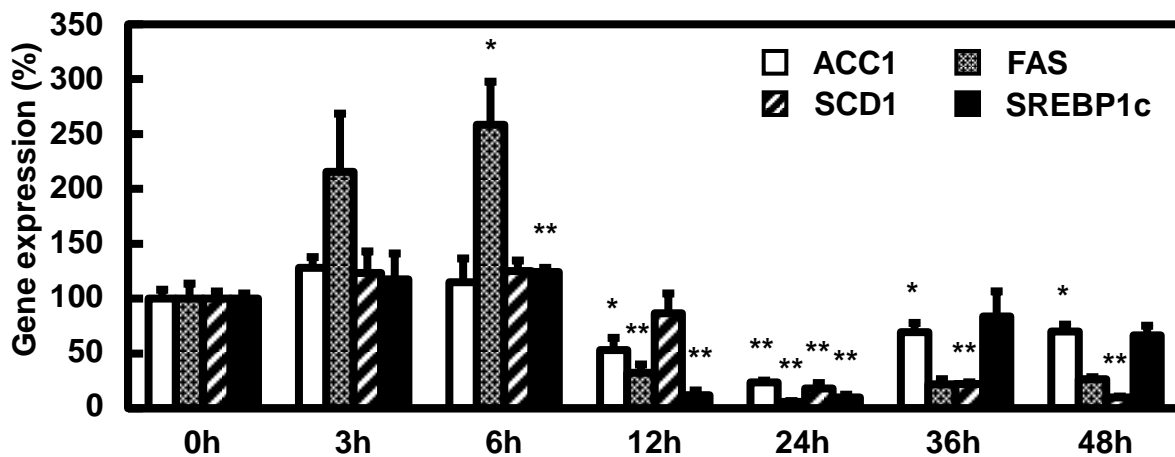

**B**

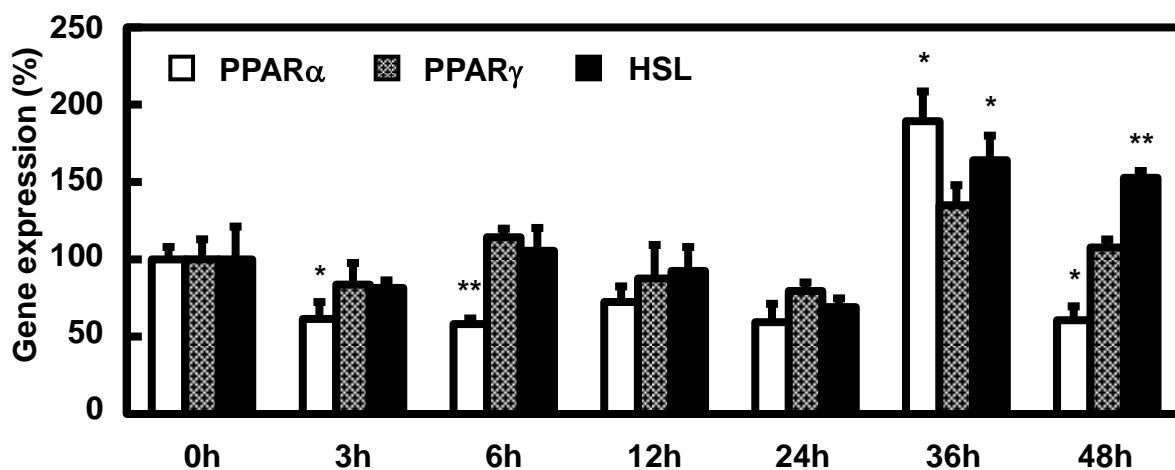

**C**

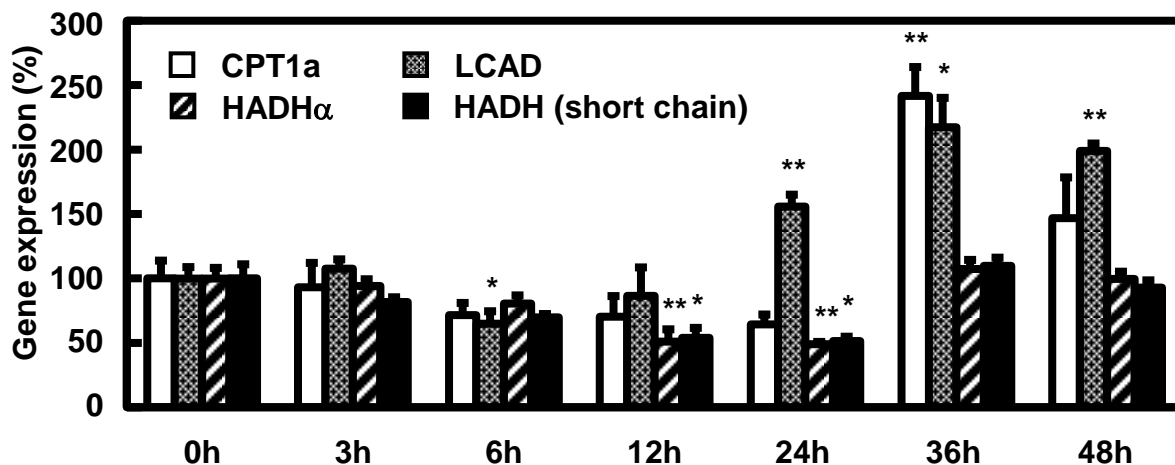

D

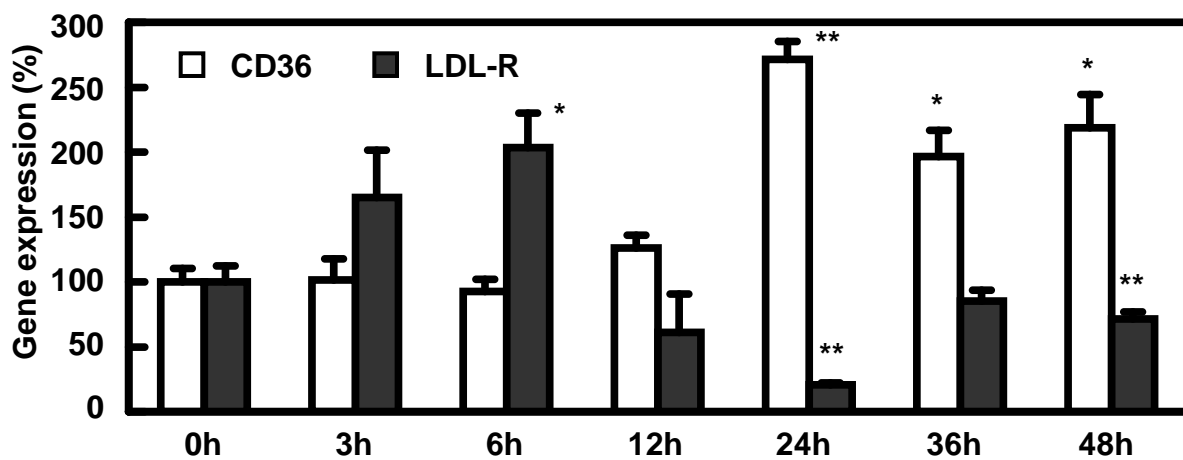

# Supplementary Figure 3

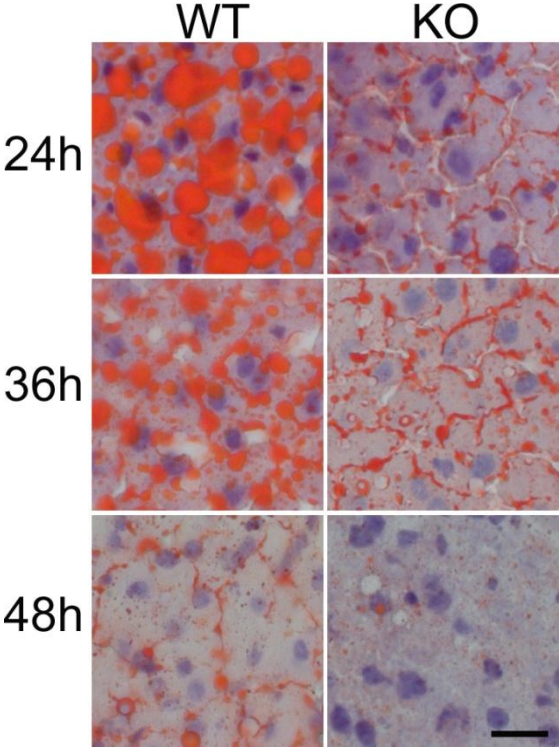

# Supplementary Figure 4

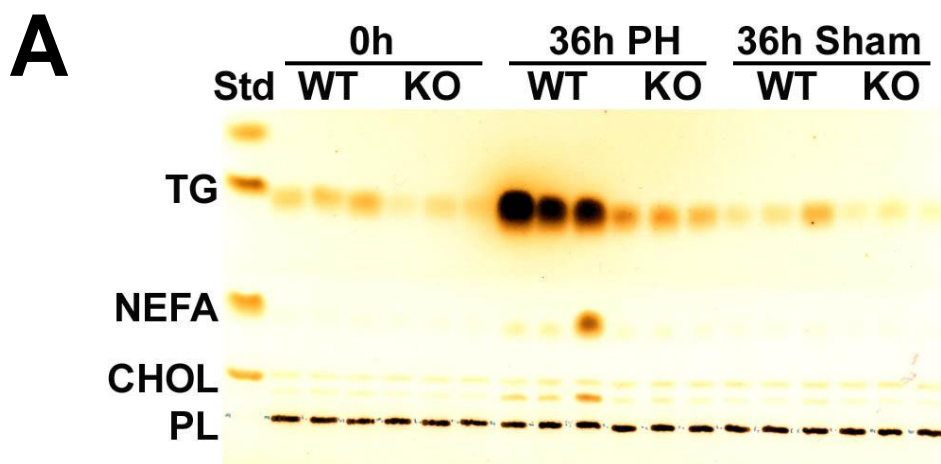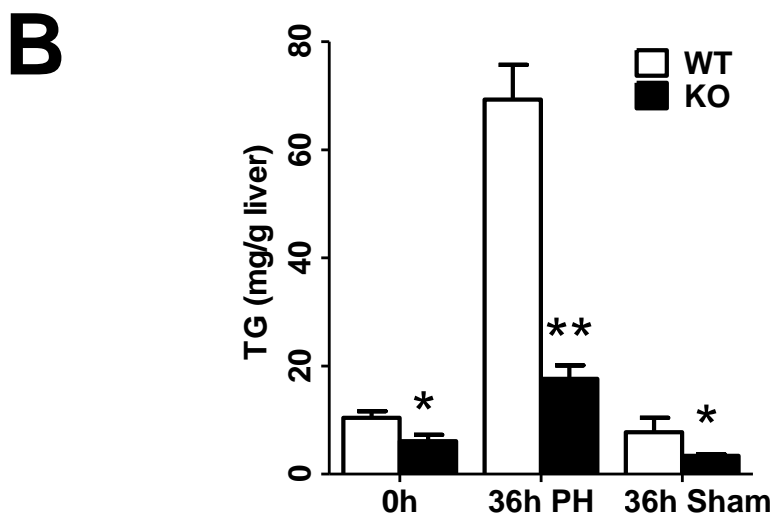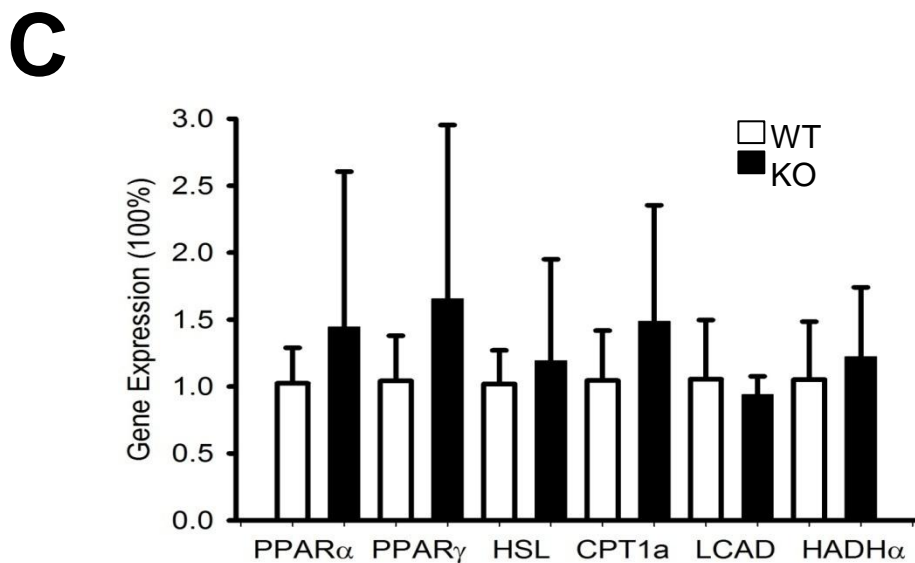

Supplementary Figure 5 (A) Liver Regeneration Index 48h after PH (remnant liver weight divided by BW before sacrifice) (B) BW of mice before and within a week after PH

**A**

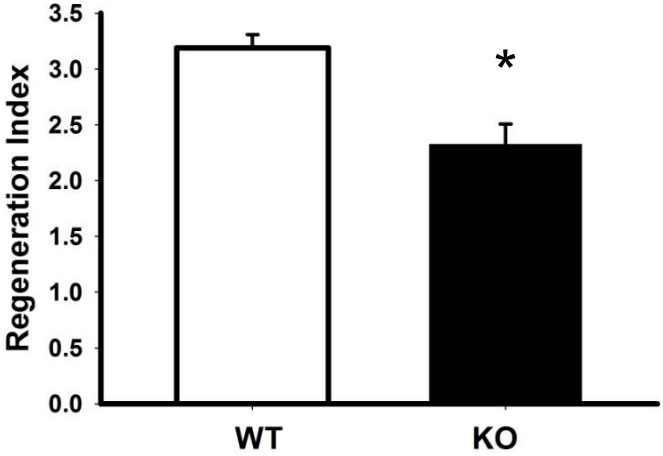

**B**

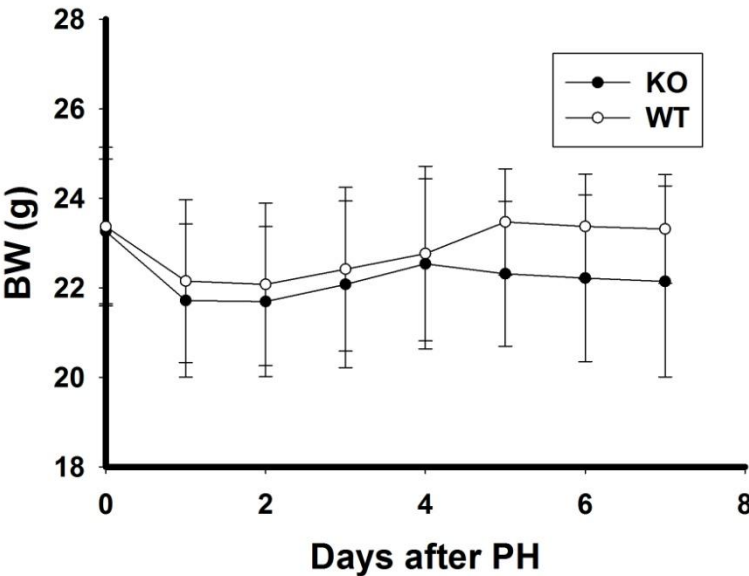

# Supplementary Figure 6

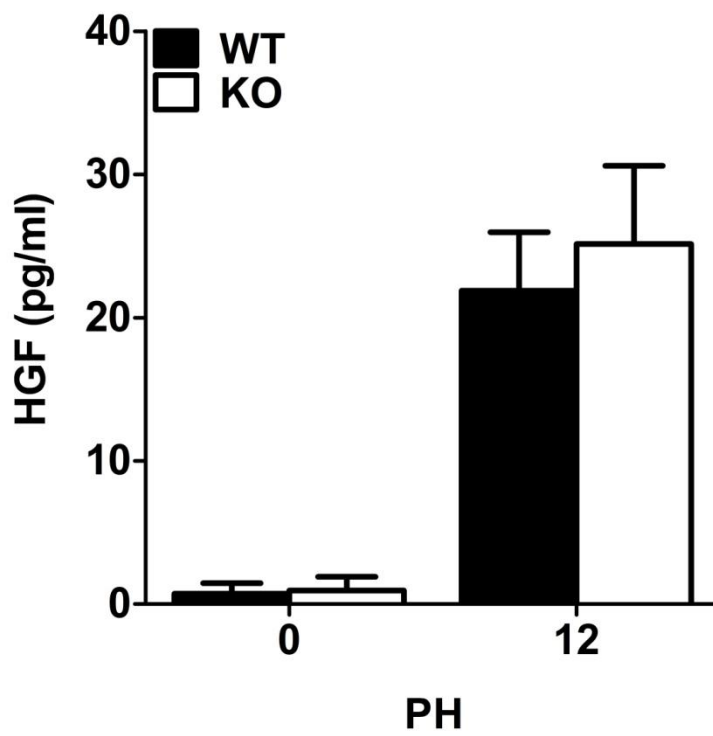

Supplement: NIHMS572697-supplement-Figures.pdf [file NIHMS572697-supplement-Figures.pdf]
